# Supplementary material for: The DONE framework: Creation, evaluation, and updating of an interdisciplinary, dynamic framework 2.0 of determinants of nutrition and eating
Source: PLOS journal article supplement (doi:10.1371/journal.pone.0171077), 2017-02-02
Supplement: S2 (10.1371/journal.pone.0171077.s002) [file journal.pone.0171077.s002]

**The DONE framework: Creation, evaluation, and updating of an interdisciplinary,  
dynamic framework 2.0 of determinants of nutrition and eating**

**S2 Appendix**

## Appendix 2

### Questions to external experts for pilot updating round

*The DONE framework has been developed within the DEDIPAC project. Our aim is to include all factors associated with dietary behavior, nutrition and food choice. In order to judge whether we have been successful in including the most important factors, we would like to ask you to list below the five factors that you believe are the most important factors of dietary behavior, nutrition and food choice.*

- 1: \_\_\_\_\_
- 2: \_\_\_\_\_
- 3: \_\_\_\_\_
- 4: \_\_\_\_\_
- 5: \_\_\_\_\_

*Finally, we would like to show you the current structure of the DONE framework. The factors in the DONE framework are organized on three levels of increasing specificity. The figure below shows you these levels. There are thus no individual factors in this figure, only the overall structure of the categories to which all the factors belong.*

*We would like to ask you to browse through the categories and respond to some questions about the structure of the framework. The categories are presented here and will also be shown on each of the next pages accompanying the questions.*

*Categories of the DONE framework*

|               |                |                                 |                                                 |                                  |                                      |                         |                                     |                      |                       |                                         |
|---------------|----------------|---------------------------------|-------------------------------------------------|----------------------------------|--------------------------------------|-------------------------|-------------------------------------|----------------------|-----------------------|-----------------------------------------|
| Individual    | Biological     | Anthropometrics                 | Biological Demographics                         | Brain Function                   | Food-Related Physiology              | Oral Function           | Physical Health                     | Sensory Perception   | Sleep Characteristics |                                         |
|               | Psychological  | Eating Regulation               | Food Beliefs                                    | Food Habits                      | Food Knowledge, Skills and Abilities | Health Cognitions       | Mood And Emotions                   | Personality          | Self-Regulation       | Weight Control Cognitions And Behaviors |
|               | Situational    | Hunger                          | Related Health Behaviors                        | Situational And Time Constraints | Situational Demographics             |                         |                                     |                      |                       |                                         |
|               | Socioeconomic  | Personal Socio-Economic Status  |                                                 |                                  |                                      |                         |                                     |                      |                       |                                         |
|               | Interpersonal  | Cultural Cognitions             |                                                 |                                  |                                      |                         |                                     |                      |                       |                                         |
| Interperson.. | Social         | Family Food Culture             | Family Structure                                | Parental Attitudes And Beliefs   | Parental Behaviors                   | Parental Feeding Styles | Parental Resources And Risk Factors | Social Influence     | Social Support        |                                         |
|               | Cultural       | Cultural Behaviors              | Cultural Cognitions                             |                                  |                                      |                         |                                     |                      |                       |                                         |
|               | Socio-Economic | Household Socio-Economic Status |                                                 |                                  |                                      |                         |                                     |                      |                       |                                         |
| Environment   | Product        | Extrinsic Product Attributes    | Intrinsic Product Attributes                    |                                  |                                      |                         |                                     |                      |                       |                                         |
|               | Micro          | Eating Environment              | Home Food Availability And Accessibility        | Portion Size                     |                                      |                         |                                     |                      |                       |                                         |
|               | Meso / Macro   | Characteristics Of Living Area  | Environment Food Availability And Accessibility | Exposure To Food Promotion       | Food Outlet Density                  | Market Prices           | Natural Conditions                  | Societal Initiatives |                       |                                         |
| Policy        | Industry       | Industry Influence              | Industry Regulations                            |                                  |                                      |                         |                                     |                      |                       |                                         |
|               | Government     | Broader Governmental Policies   | Campaigns                                       | Governmental Regulations         |                                      |                         |                                     |                      |                       |                                         |

*In your opinion, are there important categories missing in the framework?*

[Open answer format]

*Would you change the names of any of the categories in the framework?*

[Open answer format]

*We would also like to ask you to categorize the five factors that you indicated as important earlier in the survey. In which category would you place each of these five factors? If there is no fitting category for your factor in the framework yet, please write the name of a category you think should be included in the DONE framework to which your factor would fit.*

Categories of the DONE framework

|                |                |                                 |                                                 |                                  |                                      |                         |                                     |                      |                       |                                         |
|----------------|----------------|---------------------------------|-------------------------------------------------|----------------------------------|--------------------------------------|-------------------------|-------------------------------------|----------------------|-----------------------|-----------------------------------------|
| Individual     | Biological     | Anthropometrics                 | Biological Demographics                         | Brain Function                   | Food-Related Physiology              | Oral Function           | Physical Health                     | Sensory Perception   | Sleep Characteristics |                                         |
|                | Psychological  | Eating Regulation               | Food Beliefs                                    | Food Habits                      | Food Knowledge, Skills and Abilities | Health Cognitions       | Mood And Emotions                   | Personality          | Self-Regulation       | Weight Control Cognitions And Behaviors |
|                | Situational    | Hunger                          | Related Health Behaviors                        | Situational And Time Constraints | Situational Demographics             |                         |                                     |                      |                       |                                         |
|                | Socioeconomic  | Personal Socio-Economic Status  |                                                 |                                  |                                      |                         |                                     |                      |                       |                                         |
|                | Interpersonal  | Cultural Cognitions             |                                                 |                                  |                                      |                         |                                     |                      |                       |                                         |
| Interperson... | Social         | Family Food Culture             | Family Structure                                | Parental Attitudes And Beliefs   | Parental Behaviors                   | Parental Feeding Styles | Parental Resources And Risk Factors | Social Influence     | Social Support        |                                         |
|                | Cultural       | Cultural Behaviors              | Cultural Cognitions                             |                                  |                                      |                         |                                     |                      |                       |                                         |
|                | Socio-Economic | Household Socio-Economic Status |                                                 |                                  |                                      |                         |                                     |                      |                       |                                         |
| Environment    | Product        | Extrinsic Product Attributes    | Intrinsic Product Attributes                    |                                  |                                      |                         |                                     |                      |                       |                                         |
|                | Micro          | Eating Environment              | Home Food Availability And Accessibility        | Portion Size                     |                                      |                         |                                     |                      |                       |                                         |
|                | Meso / Macro   | Characteristics Of Living Area  | Environment Food Availability And Accessibility | Exposure To Food Promotion       | Food Outlet Density                  | Market Prices           | Natural Conditions                  | Societal Initiatives |                       |                                         |
| Policy         | Industry       | Industry Influence              | Industry Regulations                            |                                  |                                      |                         |                                     |                      |                       |                                         |
|                | Government     | Broader Governmental Policies   | Campaigns                                       | Governmental Regulations         |                                      |                         |                                     |                      |                       |                                         |

[1<sup>st</sup> factor mentioned]: \_\_\_\_\_

[2<sup>nd</sup> factor mentioned]: \_\_\_\_\_

[3<sup>rd</sup> factor mentioned]: \_\_\_\_\_

[4<sup>th</sup> factor mentioned]: \_\_\_\_\_

[5<sup>th</sup> factor mentioned]: \_\_\_\_\_
