# Supplementary material for: The DONE framework: Creation, evaluation, and updating of an interdisciplinary, dynamic framework 2.0 of determinants of nutrition and eating
Source: PLoS One. 2017 Feb 2;12(2):e0171077. doi: 10.1371/journal.pone.0171077 (PMC5289713; doi:10.1371/journal.pone.0171077)
Supplement: S2 Data — (XLSX) [file pone.0171077.s005.xlsx]

## Sheet: data
expert ID	informed consent	age group	is the framework comprehensive?	is the framework useful?	framework open evaluation	coding of open evaluation	use in own research	coding of use in own research	would you change the names of any categories?
4	1	2	5	5	In my opinion the framework covers all necessary categories and reflects the variety of broad factors contributing to nutrition and dietary behavior. It might be difficult to estimate the influence of certain factors (i.e. industry influence) which play	1	Considering that my main focus is on family history of cancer, I do not see how the DONE framework could be implemented in my analyses. However, it is absolutely worth looking into how it could be used in analyses regarding nutrition and cancer.	3	All categories are understandable, therefore I would not Change the names.
8	1	2	5	3	-66	-77	-66	-77	It' s not clear whether eating regulation refers to purposefully limiting intake of certain foods-dieting-, or eating regulation as in the ability to resist unhealthy foods, for instance? If it is the latter, does it belong to the superordinate catego
9	1	2	5	5	It is excellent - a much-needed, systematic and innovative approach to categorizing the various factors involved in dietary choice.	1	Yes, though it is not clear exactly how the model can be operationalized in a research context.	1	No.
10	1	2	5	5	very good	1	yes	1	overlap between individual-interpersonal and interpersonal-cultural ? What does the individual-interpersonal add what is not included in the interpersonal-cultural ?
12	1	2	4	4	Although dietary behaviors are very complex and multifaceted, this framework provides a concise and clear overview. Inherent to the complex nature of eating behaviors, this framework still represents a simplification of all factors that influence dietary	1	It is good to see my personal topic in a bigger perspective; it covers only one of many factors, and it is important to keep the complete picture in mind. But the use of this framework in my own line of work probably ends there. It could, however, be ins	3	Based on this framework, I am not sure what the difference is between Eating regulation and Self-Regulation (both under Individual/Psychological); whether eating regulation is a specific form of self-regulation or a completely different factor. I am mis
14	1	2	4	3	I think it's very good to have this comprehensive framework, also to put findings that fall within one of these categories in perspective (i.e. it helps to remind people of the bigger picture)	1	I'm not sure how I could use it but I would certainly refer to it	1	I'm just not sure what to imagine regarding the distinction between extrinsic and intrinsic product attributes
15	1	2	4	4	It seems to be quite a comprehensive framework. Because my knowledge lies in the field of psychology I would like a short description per variable to be able to understand the meaning of some of the determinants. It may also be good to see if some va	1	If I were to design a campaign I might. But I would like to know a bit more about how strongly a determinant is related to eating behavior and how easy it is to change them.	1	Food promotion => media influences Social influences can be further specified into modeling, social norms, etc. Also for the adult category it is probably good to focus less on the parents. For me it is also not very clear what the difference is betwe
18	1	3	4	3	good, but not perfect	1	don't know	3	Situational demographics, Cultural Cognitions
20	1	2	5	5	Excellent quality - very comprehensive	1	Yes	1	No
21	1	3	5	5	looks fine to me!	1	Could do, if I would work on nutrition-related projects again.	1	no
23	1	2	3	3	Yes	1	No	2	Biological demographics-what exactly does this mean? Ill-health and medications needs to be captured more specifically. Advertising as well as food promotion needs to be captured.
24	1	2	5	3	Quality depends on who is giving answers	3	we are using a lot of questionnaires already, so the use of DONE would depend on the time requirement, the availability in the national language, and some sort of validation	1	what exactly means: situational demographics?
28	1	2	5	4	good	1	maybe	3	no
31	1	2	3	3	GOOD	1	yes	1	no
40	1	2	5	5	It is enumerative and descriptive, not explanatory. What is needed is a theoretical framework that includes all these concepts in a systematic manner	2	yes	1	no
41	1	2	5	4	It seems very thought through and comprehensive with respect to grouping factors and it covers input from many disciplines. Some factors/groups seem to be less relevant than others, and I wonder if prioritzing would simplify the model. However, I also do	1	The model would give me some more ideas on using confounding factors in my research, and introduces the question on the need of multilevel modelling in my work.	1	just one: hunger
42	1	2	5	4	It's very difficult to evaluate any framework without having put it into a practical test first. This seems like a rather good, comprehensive version 1 - but it's probable that you'll need to modify it later.	1	Yes, I could consider using it.	1	Parental Modelling instead of Parental Behaviors?
44	1	2	4	5	From my point of view, the framework allows to define research aims on a new level of specificity. In best case, insular results from different disciplines can be integrated into a more holistic perspective on the whole field. In worst case, the framewor	1	Dietary behavior and related topics are only of minor interest in my current focus of work. However, whenever being involved in interdisciplinary projects approaching to investigate DONE related topics, I am sure to find a help in this framework.	1	If at all, looking at the structure from an adult perspective, I wonder if parental and family influences on the interpersonal level are over-represented. I could imagine that friends and broader social environment plays a more important role than is pre
45	1	2	4	3	good heuristic	1	As a heursitic.	1	No
46	1	1	4	4	In my opinion the DONE Framework provides a very good and comprehensive overview of the nutrition topic and the determinants related with this topic. It may become a very helpful and handy tool not only for sientists that are working in the field of nutr	1	I would do so! I could image to use it as a conceptional model and during university lectures	1	1. Not quite clear;´: Why is at the individual level the category interpersonal Cultural cognition listed? It is again listed under the Main topic Interpersonal/Cultural factors which I would prefer; 2. I would change Cultural behaviour into cult
47	1	2	5	3	Medium-high	1	NO	2	no
48	1	2	2	3	Should be useful, but as a category/ies is a bit confuse	1	Not really... Or not at this point...	2	Parental Feeding Styles is not very clearly (What is meant?)
50	1	2	4	4	represents all levels. Cannot judge if factors are complete	1	yes	1	no
51	1	2	4	4	I find it quite complete except that I am wondering why farmers and agricultural activities have not been taken into account	1	possibly	3	no
53	1	2	5	5	I find it to be of high quality. It gives an easy to understand overview of a very complex interplay of factors.	1	Yes, most definitely!	1	Cultural cognition occurs at both the individual and interpersonal level - meant to be like that? Other than that I find the categories all fit well.
55	1	1	4	4	It seems to be a good and useful collection of factors that need to be considered!	1	yes	1	no
56	1	3	5	4	The framework is qualitatevely very high.	1	I am worried it might be too complex and/or time-consuming to be routinely used in the clinical practice, especially for older persons.	3	No
58	1	2	5	2	Useful as a category system and for educational puposeses. Not so sure if the categories can really be separated in practice though	1	Maybe as an intro slide in a lecture	1	I think everybody could settle on these terms or at least understand what is meant
59	1	1	4	5	very good	1	yes, very helpful	1	beliefs versus cognitions?
60	1	1	4	4	It is not so easy... What about the interactions between different levels ? for instance, industry influence can have different levels of impact depending on family food culture and on personal socio-economic status. How do it take into account that t	3	My own line of work is not so global, and focusses only on some of the determinants (because of my own competencies and of available data). It could from my point of view, be usefull for interdisciplinary collaborations, and then a crucial point woul	1	I do not understand natural conditions . I said just before that I was not sure to see what eating environment encompasses. Where goes the influence of peer groups ? (maybe this answers to the preceding question, but there seems to be no return
65	1	2	4	3	The overall quality of the DONE framework seems very good	1	Possibly I would consider it	1	no
68	1	2	5	5	Good	1	Part of the DONE framework would be useful for my own research.	1	None.
71	1	3	5	5	In my opinion this framework is well designed	1	Yes	1	No
72	1	2	4	5	very wide-ranging, easily understandable very good	1	yes, I might	1	Mood and Emotions -> Affect
73	1	2	5	5	In my opinion this DONE framework possess high quality due to many aspects of food choice. It is very difficult to show every part of dietary habits but this framework also with dietary disorders for example binge eating disorder which is not so rare di	1	Yes, in part of my nutrition field could be very useful	1	No
76	1	2	5	5	see above	3	i already use a similar approach to analysing research questions (catagorizing determinants on different levels)	3	not necessarily, but examples what these categories include would be beneficial
77	1	2	4	4	Good.	1	Why not.	1	see before biologic demographics is an unknown term to me food-related physiology: food-related metabolic response as I cannot go back: personal SES should be more specific as all other categories are very extensive: so income, job, education
78	1	1	4	4	-	3	yes	1	no
80	1	2	4	4	It looks good; but it seems that the levels of detail differ from category to category	1	maybe parts of it	3	I would need more details about the categories in order to judge if the labels are appropriate
81	1	2	4	4	not without further information, a lot of aspects are considered	3	only aspects as all of them are hard to measure in one study and within a certain population perhaps not relevant to see effects between subjects	1	anthropometrics eating environment to setting campaigns (unclear if food ads or health campaigns)
83	1	1	4	4	good	1	why not	1	I am not confortable with the employ of Situational to describe Hunger, etc...
84	1	2	4	4	The quality seems very comprehensive and well organized. The categories are appropriate but needs to implemented.	1	Yes	1	No
86	1	1	4	4	NA	3	Yes	1	NA
87	1	2	5	4	Without specific information about each of the categories, I cannot really evaluate the framework.	3	If I had more information about the specific categories, perhaps.	3	Yes, many, such as behaviors vs. cognitions as part of the culture dimension. What about emotions and automatic effects?
89	1	2	4	5	difficult	3	interesting idea	3	no
92	1	2	4	3	No	2	No	2	No
93	1	1	4	4	To me it seems quite complete and comprehensive.	1	yes it provides a very nice overview off all possible factors influencing food choice at the different levels of influence.	1	no
94	1	2	5	4	Good starting points	1	Not applicable	2	No
96	1	2	4	5	very good overview and summary of the complexity of human eating behavior good structure	1	Currently, I'm not sure HOW to use it, but I really would consider it.	1	division of biological and demographic could be considered
98	1	1	3	3	Seems okay but the Foresight Systems Map published in 2007 by the UK government already has a framework which is more comprehensive that this one.	2	No, since I feel the Foresight Systems Map suits my needs better.	2	Biological demographics could be more precise - genetics or genotype Food-related physiology could be more precise - metabolism Food beliefs - could be broader to include - beliefs, attitudes and values Brain function seems too general - not sure what
99	1	2	3	4	Overall the DONE framework is essential. we need a consensus and a global classification to improve comparison across studies. to be sure that vocabulary/verbatims are similar, some examples could be provided	1	of course yes! to refer to a classification of determinants	1	situational could be replace by state. what is industry regulations some example may improve clarity and understanding of each category
101	1	2	4	3	Individual: good Interpersonal: excessive focus on family; cultural should be in environment ; mimetism and imitation is missing; cascade effects, etc. Dynamic should be introduced here, as a creation process of habits and culture... This section la	3	I shall wait for an improved version	1	I would add pleasure ; commensuality ; joie de vivre or happyness ; consumer association ; shelf displays or marchandizing ; microbiota-flora ; role model
102	1	1	4	4	good	1	no	2	no
104	1	2	2	2	In what terms? Relative to what? The structure of the Framework appears awkward to me. Many of the factors cannot really be attributed to one of the headlines on the left.	3	No	2	Environment Food Availability and Accessibility -> not sure environment is necessary. Also, how much does this overlap with Characteristics of living area, and Food outlet density?
105	1	1	5	4	looks complete, allows cross-linking	1	yes, if funds available	1	no
107	1	1	4	5	I'm missing the explicit suggestion that behavior will probably be the result of an interaction between different 'blocks' in the framework	3	yes	1	no
110	1	2	3	4	good	1	yes	1	--
111	1	2	4	4	Well thought-through framework that includes all major incluences on dietary behavior.	1	Yes.	1	Individual - Psychological - Eating Regulation - I have difficulties understanding this category (eating regulation). Is it a regulation imposed by something or someone external? Interperson - Social - Social influece - The category (social influece)
113	1	2	3	4	difficult to make clear interpretation I would say it will add significantly to our current knowledge	1	yes, for epidemiological work	1	no, seems ok for me
115	1	3	4	4	good	1	yes	1	no
116	1	2	4	5	It looks very thorough and complete, a good framework to work with in all disciplines - including education of dietitians and nutritionist! In a later stage perhaps some examples could be given to clarify possible overlapping category even more.	1	Sure!	1	Not really, the framework seems well thought on and complete. Only a few ideas I'd kindly like to share: A bit confusing to have the subcategory interpersonal of the category individual ... while there is also a main category interpersonal as s
117	1	1	4	4	high	1	Since our research group has a very specific focus it may be of less use, but it is a very nice comprehensive framework to implement in education;	1	brain function is very general; ? executive functions
118	1	1	4	4	more interactions between categories	3	perhaps	3	no
119	1	2	5	4	structure is well balanced and seems complete. Good framework.	1	Not at this moment since I see little connection with the type of work I am currently doing	2	See the question before... On the other hand, I'm not sure if Cultural cognitions is the best name... Cognition is more individual than cultural in my opinion.
123	1	2	5	4	it would be easier to evaluate the framework if definitions were available also	3	yes, in educational setting	1	food outlet density is not clear for me
124	1	3	2	4	yes	1	no	2	Change Broader Governmental Policies to Public Policies . Error in my answer to the last question: I would add a Third-Party row in the Policy category. Private policies by third-parties (journalists, food activists etc.) also matter. Besides, the
125	1	1	4	3	-66	-77	-66	-77	no
128	1	2	4	2	I want to skip this point. It is not clear to me what is framework should be used for and how it should be used.	3	No	2	No
129	1	1	4	4	I found it comprehensive and very useful.	1	Yes	1	to discriminate between cultural behaviors and religious reasons.
130	1	2	4	5	almost yes	1	Yes, depends on my topic of work.	1	no
131	1	1	4	4	I think the overall quality is ok, only not clear why for example some interpersonal factors are named and others (peers, teachers) not. Quite general on environmental level. Some wordings are quite general so not always easy to understand what is ex	1	Yes	1	Biological demographics: not clear what is meant; sleep characteristics: is this biological?; personality: not biological?; why interpersonal on the individual level?;
132	1	2	5	4	very interesting approach, very comprehensive!	1	yes	1	probably not, but translation into other languages need to be carefully managed
134	1	3	3	4	For me (just occured) the connection to physical activity is missing in the DONE Framework because it is connected to diet and nutrition. furthermore the lifespan approach is also not visible in the present modell because social support does for me not i	3	it is very complex and I am not sure to use it as a whole but part of it I will consider for my own line of work.	1	As in the previous question, I would change Related Health Behaviors , but as I have no idea what's in it, I can't suggest a better name.
135	1	1	4	4	Good. One remaining question: why are 'cultural cognitions' reported twice, in two categories?	1	Yes	1	Food and eating habits Food and eating knowledge, skill and abilities Family food and eating culture What is meant by 'parental behaviors'? I think this term should be specified as it could refer to different things such as parenting paractices, par
137	1	3	4	4	0 (worst) to 10 (best) I would allocate eight points. The categories are very thorough and well thought of. Also influential factors that are less well studied were included (like sleep). For some categories a different wording may be advisable.	1	probably yes.	1	'Health cognitions' is unclear to me. Extrinsic Product Attributes. Should it be more specific 'food product attributes'?-same for intrinsic Product Attributes. What is ment by 'natural conditions'?
138	1	1	4	4	The DONE framework shows an extensive range of categories divided into different levels which should be considered when evaluating dietary behaviour and subsequently influencing, promoting, and adopting healthy dietary behaviour.	1	Probably, the categorisation of factors into different levels gives a clear overview of where one needs to act in order to influence dietary behaviour.	1	no
139	1	1	5	5	very good	1	Yes	1	I wonder whether the line 'situational' can not be omitted? E.g. situational demography: what is the difference with biological demography? This is difficult to understand without explanation or examples. E.g. hunger: this could also be a biological
140	1	2	4	3	Do you want a yes/no answer or a detailled evaluation? Sorry, but your question is not very clear.	3	No (it does not apply to my current research topic).	2	Societal Initiatives ??? Extrinsic and Intrinsic Product Attributes ??? Some categories are rather general and it's not quite clear what is meant, e.g. cultural congnitions.
142	1	1	5	3	professional, conversion to practice is necessary	1	difficult at this level	3	NO
143	1	1	4	4	Detailed and understanding All ecological step are taken into account	1	probably	1	no
145	1	2	5	5	Good	1	Yes	1	No
148	1	2	2	2	I fail to see the use of this - it reminds me of other ambitions to map the Whole World and how everything is connected - e.g. the framework for obesity. My problem with this, is that such maps represent a flat ontology, where everything are just 'fac	2	No	2	yes - do not understand several category names. Where is e.g. no of eating companions, meal duration
150	1	2	4	3	interesting, interrelationship between the sector is needed	1	partly	1	it is not compeletely clear what is meant with extrinsic and intrinsic factors
151	1	2	3	2	This is very difficult because I do not know what are the goals of this group and this DONE framework. Mojet published a diagram of factors in food choice, and I use that in lectures. Are you achieving any more with this version? Also, I preferrer to stu	3	I do not need it. I would refer to it when lecturing for completeness, but I would probably continue to use the Mojet organization.	1	Physical health and physical activity
152	1	3	4	4	well	1	yes	1	no
153	1	1	5	4	Good	1	Yes	1	For me it is not clear why cultural cognitions can be present in two different categories (interpersonal & interperson). I would change in the interpersonal category the term cultural awareness or would erase the interpersonal category cultural cognit
155	1	1	5	4	pretty good	1	it might happen	1	no
158	1	1	4	4	Well sctructured.	1	Yes.	1	No.
159	1	3	4	4	-99	-77	-66	-77	No
160	1	2	2	1	The framework is not focused on dietary behaviour but focused on obesity. Dietary patterns of different patient population groups is influenced by many other factors than those proposed here. In the context of obesity, I do not see any added value of the	2	no	2	n
161	1	3	4	4	The concept is new to me. It's intersting and has a high actuality. It involves both nutrition and physical activity, 2 of the possibly most important factors for a healthy living. In our globally aging world it is of outmost importance to stress factors	1	Yes	1	No
164	1	2	5	5	I evaluate it as very good. Although of course more information is required to fully evaluate it.	1	Yes.	1	No
166	1	2	5	5	good way to structure the issues related to nutrition and food consumption behaviour	1	I could be inspired by the DONE framework	1	no
167	1	2	5	5	It's difficult to judge the quality by only looking at it. Its usefulness/comprehensiveness will show when applying it. But face validity-wise, it looks good to me.	1	The framework may certainly help to pinpoint which factor(s) is/are the focus of a research project or intervention. It can also be used in teaching, to show students the different determinants involved in eating behaviour. In our educational programme w	1	The Interpersonal level factors include mostly parental influences, while peer and other (broader) societal influences would seem also influential (especially later in the life course) to me. I'm not sure whether Campaigns should be a separate fac
168	1	1	5	4	The question is too difficult. The quality depends on how helpful it is for those who start implementing the changes.	3	My work is experimental and focuses on a narrow field (consumer responses to food products), thus this framwork is too wide and general for framing my own work	2	No.
170	1	1	4	4	GOOD	1	May be	3	NO
171	1	2	5	3	Good quality, but you have to focus.	1	Perhaps	3	No
172	1	2	5	5	interesting and useful to set polocies	1	why not	1	no
175	1	1	5	4	It is a very elaborate and extensive framework, possibly some categories could be summarised: e.g. Parental Attitudes And Beliefs & Parental Behaviors.	1	Yes	1	No
176	1	1	4	4	I think the DONE Framework will provide a complete overview of the factors that could influence the dietary behaviour. But i also think that it will be very hard to rate these influencing factors in an objective and valid way to receive convincing result	1	I think that for some research questions the DONE framework will be a valid tool. So i would say, that i will consider using the DONE framwork, when it is suitable for a research question i work on at a later time point.	1	No
178	1	1	4	3	?? unclear. not sure how best to answer this question? are you asking for a value or are you asking per se if this COULD be done?	3	yes, possibly	1	in psych category - have 'eating egulation' and 'self-regulation' i just wonder if 'self-regulation' is a component of the more general 'eating regulation' rather than a separate box? again, social support might come under the box 'social influence'? r
180	1	1	4	4	Good	1	In parts	1	No
183	1	1	4	5	profound quality	1	is elaboration of ecological systems theory on childhood overweight ?	3	Market prices is to narrow - proposal: food market situation
184	1	1	4	4	very good	1	yes	1	I would change feeding styles to encompass styles and practices, so that you could describe not only the style of feeding (e.g. authoritarian) but also the specific practices (e.g. force feeding).
186	1	1	3	4	This would take too much time, but by the first overview it seems for me that all important factors/categories are listed.	1	Yes	1	no
188	1	3	4	4	The DONE framework captures many of the determinants but some are very vague and would need to be refined to be useful to the particular population group they are being applied to.	2	Useful as a teaching tool but would need adaptation for the clinical situation.	1	Some: Eating regulation does not make much sense; control of eating would be better. Self-regulation is not clear. Food habits do not only belong in the psychological realm. Among others.
189	1	1	4	4	good	1	yes	1	no
190	1	3	5	5	It is comprehensive and has a logical structure. Quality would be increased if factors are somehow weighted.	1	yes, after adding common disease factors	1	I would put many of the psychological boxes into a 'social' category; I would add a 'cultural' category - and I would rename several boxes, and make many more in the policy category. The industry and government ones are very broad indeed which is a bit o
191	1	3	3	2	In principle I can see a clear map of the putative factors that may affect diet and lifestyle choices. However, this work reminds me of the Foresight programme and not sure where the novelty is	2	application is not clear. where would I use it and for what. possibly in teaching sessions	1	not sure what food related physiology is
193	1	3	4	3	DONE framework , should be useful for what kind of people ?	3	I do not use parental attitude, but to be alone is missing...and is one of the most important factor for dietary intake...	3	I would change many of the names because I prefer to deal with consumers, and I tend to use language that normal people use, rather than academic language. Why is Hunger under Situational? I do not understand what is meant. What is Biological Demographic
194	1	3	3	1	Sorry, no!	2	No	2	No
195	1	2	5	5	yes. 8 on a 0-9 scale from poor quality 0 to high Quality 9.	1	yes	1	no
196	1	2	4	5	yes	1	yes in part	1	no
197	1	2	4	4	it is clear and covers all the main dimensions of food and dietary choices	1	yes, as a general 'conceptual' framework	1	maybe the distinction between extrinsic/intrinsic product attributes is not clear enough ??
198	1	2	4	5	The overall quality seems very good.	1	Yes	1	not necessarily ! may be add Publicity/advertisement in the box exposure to food promotion to make things clearer
199	1	2	5	4	In my opinion it covers most of the relevant aspects, in any case more time will be needed in order to think aobut it and to decide about its quality.	1	Yes, I think it is a valuable information	1	No

## Sheet: legend
informed consent	0 = no consent given; 1 = consent provided
age group	1 = children; 2 = adults; 3 = elderly
comprehensive	1 = not at all; 5 = very much
useful	1 = not at all; 5 = very much
coding open evaluation	1 = good quality, 2 = not good quality, 3 = unable to judge quality
coding use in own research	1 - yes, 2 = no, 3 = unsure
coding name change	0 = no name change suggested; 1 = name change suggested
-77 = missing
-66 = missing
