# Supplementary material for: The DONE framework: Creation, evaluation, and updating of an interdisciplinary, dynamic framework 2.0 of determinants of nutrition and eating
Source: PLOS journal article supplement (doi:10.1371/journal.pone.0171077), 2017-02-02
Supplement: S3 (10.1371/journal.pone.0171077.s003) [file journal.pone.0171077.s003]

**The DONE framework: Creation, evaluation, and updating of an interdisciplinary,  
dynamic framework 2.0 of determinants of nutrition and eating**

**S1 Table**

| Determinant                              | Age Group | Main level | Stem-category | Leaf-category                  | OPR  | Mod  | RS   | PLE  |
|------------------------------------------|-----------|------------|---------------|--------------------------------|------|------|------|------|
| mental abilities                         | Adults    | Individual | Biological    | Brain Function                 | 1.80 | 1.55 | 1.36 | 1.82 |
| dementia                                 | Elderly   | Individual | Biological    | Brain Function                 | 1.66 | 1.00 | 1.40 | 1.87 |
| orbitofrontal cortex volume              | Adults    | Individual | Biological    | Brain Function                 | 1.54 | 1.40 | 1.11 | 1.56 |
| mental retardation                       | Adults    | Individual | Biological    | Brain Function                 | 1.53 | 1.40 | 1.40 | 1.10 |
| dental deficiency                        | Elderly   | Individual | Biological    | Oral Function                  | 2.21 | 2.13 | 1.63 | 2.06 |
| chewing problems                         | Elderly   | Individual | Biological    | Oral Function                  | 2.20 | 1.80 | 1.73 | 2.20 |
| wearing dentures                         | Elderly   | Individual | Biological    | Oral Function                  | 2.07 | 1.69 | 1.56 | 2.19 |
| pain when eating                         | Elderly   | Individual | Biological    | Oral Function                  | 2.00 | 1.81 | 1.63 | 1.75 |
| number of natural teeth                  | Elderly   | Individual | Biological    | Oral Function                  | 1.74 | 1.19 | 1.40 | 1.93 |
| genetic nutrient intolerances            | Adults    | Individual | Biological    | Food-Related Physiology        | N.A. | N.A. | N.A. | N.A. |
| hormones                                 | Adults    | Individual | Biological    | Food-Related Physiology        | N.A. | N.A. | N.A. | N.A. |
| food allergies                           | Adults    | Individual | Biological    | Food-Related Physiology        | 2.19 | 1.92 | 1.92 | 1.77 |
| physical limitations in food preparation | Elderly   | Individual | Biological    | Food-Related Physiology        | 2.09 | 1.63 | 1.69 | 2.13 |
| physical limitations in consumption      | Elderly   | Individual | Biological    | Food-Related Physiology        | 2.09 | 1.53 | 1.73 | 2.13 |
| taste sensitivity                        | Adults    | Individual | Biological    | Food-Related Physiology        | 2.07 | 2.00 | 1.58 | 1.83 |
| anorexia of aging                        | Elderly   | Individual | Biological    | Food-Related Physiology        | 2.06 | 1.44 | 1.75 | 2.13 |
| appetite                                 | Adults    | Individual | Biological    | Food-Related Physiology        | 1.92 | 1.92 | 1.50 | 1.58 |
| gut microbiota                           | Adults    | Individual | Biological    | Food-Related Physiology        | 1.87 | 2.15 | 1.23 | 1.62 |
| diminished sense of taste                | Elderly   | Individual | Biological    | Food-Related Physiology        | 1.80 | 1.20 | 1.60 | 1.80 |
| odor threshold                           | Elderly   | Individual | Biological    | Food-Related Physiology        | 1.73 | 1.31 | 1.38 | 1.81 |
| obesity-associated genes                 | Adults    | Individual | Biological    | Food-Related Physiology        | 1.59 | 1.36 | 1.40 | 1.30 |
| weight                                   | Adults    | Individual | Biological    | Anthropometrics                | 2.06 | 2.18 | 1.45 | 1.82 |
| BMI                                      | Adults    | Individual | Biological    | Anthropometrics                | 2.00 | 2.00 | 1.29 | 2.07 |
| body composition                         | Adults    | Individual | Biological    | Anthropometrics                | 1.95 | 2.14 | 1.29 | 1.79 |
| central obesity                          | Adults    | Individual | Biological    | Anthropometrics                | 1.90 | 1.75 | 1.42 | 1.83 |
| muscle mass                              | Adults    | Individual | Biological    | Anthropometrics                | 1.88 | 2.00 | 1.45 | 1.45 |
| food liking                              | Adults    | Individual | Biological    | Sensory Perception             | 2.29 | 1.92 | 1.92 | 2.08 |
| food preferences                         | Adults    | Individual | Biological    | Sensory Perception             | 2.29 | 1.91 | 1.73 | 2.36 |
| fat liking                               | Adults    | Individual | Biological    | Sensory Perception             | 2.26 | 1.92 | 1.69 | 2.31 |
| learned taste preferences                | Adults    | Individual | Biological    | Sensory Perception             | 2.22 | 1.85 | 1.77 | 2.15 |
| taste aversions                          | Adults    | Individual | Biological    | Sensory Perception             | 2.04 | 1.83 | 1.75 | 1.67 |
| food wanting                             | Adults    | Individual | Biological    | Sensory Perception             | 1.95 | 1.70 | 1.50 | 1.90 |
| preference for bitter taste              | Adults    | Individual | Biological    | Sensory Perception             | 1.92 | 1.58 | 1.83 | 1.42 |
| biological taste preferences             | Adults    | Individual | Biological    | Sensory Perception             | 1.83 | 1.69 | 1.46 | 1.62 |
| mental health status                     | Adults    | Individual | Biological    | Physical Health                | N.A. | N.A. | N.A. | N.A. |
| health status                            | Adults    | Individual | Biological    | Physical Health                | 2.18 | 1.92 | 1.58 | 2.25 |
| physical health status                   | Elderly   | Individual | Biological    | Physical Health                | 2.11 | 1.88 | 1.44 | 2.31 |
| medication use                           | Adults    | Individual | Biological    | Physical Health                | 2.08 | 1.96 | 1.44 | 2.11 |
| chronic diseases                         | Adults    | Individual | Biological    | Physical Health                | 1.98 | 1.86 | 1.29 | 2.14 |
| intensity level of required care         | Elderly   | Individual | Biological    | Physical Health                | 1.96 | 1.53 | 1.33 | 2.33 |
| frailty                                  | Elderly   | Individual | Biological    | Physical Health                | 1.80 | 1.47 | 1.20 | 2.13 |
| sleep duration                           | Adults    | Individual | Biological    | Sleep Characteristics          | 1.94 | 2.36 | 1.27 | 1.55 |
| sleep difficulties                       | Adults    | Individual | Biological    | Sleep Characteristics          | 1.79 | 1.93 | 1.14 | 1.71 |
| chronotype                               | Adults    | Individual | Biological    | Sleep Characteristics          | 1.65 | 1.58 | 1.25 | 1.50 |
| midpoint of sleep                        | Adults    | Individual | Biological    | Sleep Characteristics          | 1.62 | 2.00 | 1.10 | 1.20 |
| age                                      | Adults    | Individual | Demographic   | Biological Demographics        | 2.04 | 1.57 | 1.50 | 2.29 |
| sex                                      | Adults    | Individual | Demographic   | Biological Demographics        | 1.87 | 1.30 | 1.55 | 2.00 |
| religion                                 | Adults    | Individual | Demographic   | Cultural Characteristics       | 2.08 | 1.90 | 1.50 | 2.10 |
| cultural identity                        | Adults    | Individual | Demographic   | Cultural Characteristics       | 1.95 | 1.70 | 1.50 | 1.90 |
| ethnicity                                | Adults    | Individual | Demographic   | Cultural Characteristics       | 1.91 | 1.67 | 1.55 | 1.75 |
| nationality                              | Adults    | Individual | Demographic   | Cultural Characteristics       | 1.73 | 1.75 | 1.08 | 1.82 |
| living alone                             | Elderly   | Individual | Demographic   | Situational Demographics       | 2.15 | 1.81 | 1.50 | 2.38 |
| place of residence                       | Adults    | Individual | Demographic   | Situational Demographics       | 1.95 | 1.85 | 1.38 | 1.92 |
| being widowed                            | Elderly   | Individual | Demographic   | Situational Demographics       | 1.82 | 1.25 | 1.31 | 2.25 |
| living arrangement                       | Adults    | Individual | Demographic   | Situational Demographics       | 1.74 | 1.91 | 1.18 | 1.55 |
| urban or rural dweller                   | Adults    | Individual | Demographic   | Situational Demographics       | 1.74 | 1.56 | 1.33 | 1.67 |
| EM competency in host language           | Adults    | Individual | Demographic   | Situational Demographics       | 1.67 | 2.00 | 1.17 | 1.25 |
| EM length of stay in host country        | Adults    | Individual | Demographic   | Situational Demographics       | 1.67 | 1.67 | 1.11 | 1.67 |
| EM age at migration                      | Adults    | Individual | Demographic   | Situational Demographics       | 1.60 | 1.58 | 1.25 | 1.33 |
| level of education                       | Adults    | Individual | Demographic   | Personal Socio-Economic Status | 2.31 | 1.92 | 1.54 | 2.69 |
| low income                               | Adults    | Individual | Demographic   | Personal Socio-Economic Status | 2.19 | 1.55 | 1.55 | 2.70 |
| income                                   | Adults    | Individual | Demographic   | Personal Socio-Economic Status | 2.15 | 2.08 | 1.38 | 2.31 |

| Determinant                        | Age Group | Main level | Stem-category | Leaf-category                           | OPR  | Mod  | RS   | PLE  |
|------------------------------------|-----------|------------|---------------|-----------------------------------------|------|------|------|------|
| socio-economic status              | Adults    | Individual | Demographic   | Personal Socio-Economic Status          | 2.06 | 1.92 | 1.33 | 2.25 |
| food insecurity                    | Adults    | Individual | Demographic   | Personal Socio-Economic Status          | 2.03 | 1.55 | 1.64 | 2.09 |
| occupation                         | Adults    | Individual | Demographic   | Personal Socio-Economic Status          | 1.80 | 1.77 | 1.31 | 1.67 |
| personal values                    | Adults    | Individual | Psychological | Personality                             | 2.06 | 2.08 | 1.50 | 1.83 |
| self-efficacy                      | Adults    | Individual | Psychological | Personality                             | 2.05 | 1.93 | 1.57 | 1.86 |
| personality traits                 | Adults    | Individual | Psychological | Personality                             | 1.97 | 1.83 | 1.64 | 1.64 |
| self-esteem                        | Adults    | Individual | Psychological | Personality                             | 1.83 | 2.08 | 1.15 | 1.69 |
| distractibility when eating        | Adults    | Individual | Psychological | Personality                             | 1.79 | 2.07 | 1.27 | 1.40 |
| wellbeing                          | Adults    | Individual | Psychological | Mood And Emotions                       | N.A. | N.A. | N.A. | N.A. |
| positive emotions                  | Adults    | Individual | Psychological | Mood And Emotions                       | 1.95 | 1.67 | 1.58 | 1.82 |
| mood                               | Adults    | Individual | Psychological | Mood And Emotions                       | 1.78 | 1.90 | 1.27 | 1.55 |
| negative emotions                  | Adults    | Individual | Psychological | Mood And Emotions                       | 1.69 | 1.31 | 1.46 | 1.58 |
| EM stress about migration          | Adults    | Individual | Psychological | Mood And Emotions                       | 1.63 | 2.00 | 1.11 | 1.22 |
| depressive symptomatology          | Adults    | Individual | Psychological | Mood And Emotions                       | 1.63 | 1.62 | 1.31 | 1.31 |
| self-regulation skills             | Adults    | Individual | Psychological | Self-Regulation                         | 2.28 | 1.92 | 1.83 | 2.17 |
| self-control                       | Adults    | Individual | Psychological | Self-Regulation                         | 2.18 | 2.00 | 1.69 | 2.00 |
| executive functioning              | Adults    | Individual | Psychological | Self-Regulation                         | 2.02 | 2.00 | 1.57 | 1.71 |
| future time orientation            | Adults    | Individual | Psychological | Self-Regulation                         | 1.98 | 2.00 | 1.38 | 1.88 |
| emotion suppression                | Adults    | Individual | Psychological | Self-Regulation                         | 1.96 | 1.92 | 1.62 | 1.54 |
| impulsivity                        | Adults    | Individual | Psychological | Self-Regulation                         | 1.74 | 1.64 | 1.36 | 1.55 |
| previous experience with disease   | Adults    | Individual | Psychological | Health Cognitions                       | N.A. | N.A. | N.A. | N.A. |
| health consciousness               | Adults    | Individual | Psychological | Health Cognitions                       | 2.48 | 2.27 | 1.82 | 2.45 |
| health concerns                    | Adults    | Individual | Psychological | Health Cognitions                       | 2.32 | 2.00 | 1.75 | 2.33 |
| healthy eating motivation          | Adults    | Individual | Psychological | Health Cognitions                       | 2.28 | 2.00 | 1.85 | 2.08 |
| healthy eating intention           | Adults    | Individual | Psychological | Health Cognitions                       | 2.18 | 2.18 | 1.70 | 1.80 |
| perceived physical health          | Elderly   | Individual | Psychological | Health Cognitions                       | 1.94 | 2.00 | 1.27 | 1.93 |
| nutrition self-efficacy            | Adults    | Individual | Psychological | Food Knowledge, Skills and Abilities    | 2.38 | 2.40 | 1.70 | 2.20 |
| dietary knowledge                  | Adults    | Individual | Psychological | Food Knowledge, Skills and Abilities    | 2.38 | 2.54 | 1.57 | 2.25 |
| food knowledge                     | Adults    | Individual | Psychological | Food Knowledge, Skills and Abilities    | 2.35 | 2.33 | 1.75 | 2.08 |
| food familiarity                   | Adults    | Individual | Psychological | Food Knowledge, Skills and Abilities    | 2.28 | 2.17 | 1.64 | 2.22 |
| nutrition knowledge                | Adults    | Individual | Psychological | Food Knowledge, Skills and Abilities    | 2.15 | 2.42 | 1.58 | 1.67 |
| cooking skills                     | Adults    | Individual | Psychological | Food Knowledge, Skills and Abilities    | 2.14 | 2.54 | 1.31 | 1.92 |
| awareness of food consumed         | Adults    | Individual | Psychological | Food Knowledge, Skills and Abilities    | 2.00 | 2.38 | 1.31 | 1.67 |
| food memories                      | Adults    | Individual | Psychological | Food Knowledge, Skills and Abilities    | 1.96 | 1.83 | 1.58 | 1.67 |
| memory for food adverts            | Adults    | Individual | Psychological | Food Knowledge, Skills and Abilities    | 1.91 | 2.00 | 1.15 | 2.00 |
| perceived barrier of food price    | Adults    | Individual | Psychological | Food Beliefs                            | 2.29 | 2.31 | 1.67 | 2.08 |
| lay food beliefs                   | Adults    | Individual | Psychological | Food Beliefs                            | 2.26 | 2.09 | 1.73 | 2.09 |
| perceived food safety              | Adults    | Individual | Psychological | Food Beliefs                            | 2.22 | 2.33 | 1.67 | 1.83 |
| perceived benefit of diet quality  | Adults    | Individual | Psychological | Food Beliefs                            | 2.18 | 2.38 | 1.54 | 1.85 |
| food ethics                        | Adults    | Individual | Psychological | Food Beliefs                            | 2.12 | 2.00 | 1.70 | 1.80 |
| trust in the food industry         | Adults    | Individual | Psychological | Food Beliefs                            | 2.05 | 2.45 | 1.36 | 1.64 |
| food concerns                      | Adults    | Individual | Psychological | Food Beliefs                            | 2.04 | 2.08 | 1.58 | 1.67 |
| food involvement                   | Adults    | Individual | Psychological | Food Beliefs                            | 2.03 | 2.10 | 1.40 | 1.90 |
| food enjoyment                     | Adults    | Individual | Psychological | Food Beliefs                            | 2.01 | 1.83 | 1.58 | 1.83 |
| attitudes toward sustainable foods | Adults    | Individual | Psychological | Food Beliefs                            | 1.99 | 2.17 | 1.42 | 1.67 |
| food risk aversion                 | Adults    | Individual | Psychological | Food Beliefs                            | 1.90 | 2.20 | 1.40 | 1.40 |
| habitual eating                    | Adults    | Individual | Psychological | Food Habits                             | 2.45 | 2.00 | 1.70 | 2.80 |
| past eating behavior               | Adults    | Individual | Psychological | Food Habits                             | 2.27 | 1.92 | 1.62 | 2.46 |
| eating routines                    | Adults    | Individual | Psychological | Food Habits                             | 2.25 | 2.07 | 1.64 | 2.21 |
| willingness-to-pay                 | Adults    | Individual | Psychological | Food Habits                             | 2.13 | 2.00 | 1.25 | 2.50 |
| mindfulness                        | Adults    | Individual | Psychological | Eating Regulation                       | 2.15 | 2.08 | 1.75 | 1.75 |
| mindful eating                     | Adults    | Individual | Psychological | Eating Regulation                       | 2.06 | 2.25 | 1.67 | 1.42 |
| intuitive eating                   | Adults    | Individual | Psychological | Eating Regulation                       | 2.00 | 1.86 | 1.71 | 1.57 |
| food selectivity                   | Adults    | Individual | Psychological | Eating Regulation                       | 1.97 | 1.92 | 1.50 | 1.75 |
| neophobia                          | Adults    | Individual | Psychological | Eating Regulation                       | 1.94 | 1.82 | 1.64 | 1.55 |
| external eating                    | Adults    | Individual | Psychological | Eating Regulation                       | 1.85 | 1.64 | 1.45 | 1.73 |
| emotional eating                   | Adults    | Individual | Psychological | Eating Regulation                       | 1.85 | 1.58 | 1.58 | 1.58 |
| body weight perception             | Adults    | Individual | Psychological | Weight Control Cognitions And Behaviors | N.A. | N.A. | N.A. | N.A. |
| weight loss intention              | Adults    | Individual | Psychological | Weight Control Cognitions And Behaviors | 2.29 | 2.18 | 1.73 | 2.09 |
| restrained eating                  | Adults    | Individual | Psychological | Weight Control Cognitions And Behaviors | 2.22 | 1.92 | 1.77 | 2.08 |
| eating in the absence of hunger    | Adults    | Individual | Psychological | Weight Control Cognitions And Behaviors | 2.15 | 2.31 | 1.54 | 1.85 |
| weight control goal                | Adults    | Individual | Psychological | Weight Control Cognitions And Behaviors | 2.10 | 2.08 | 1.58 | 1.83 |

| Determinant                                   | Age Group | Main level    | Stem-category | Leaf-category                           | OPR  | Mod  | RS   | PLE  |
|-----------------------------------------------|-----------|---------------|---------------|-----------------------------------------|------|------|------|------|
| weight control concerns                       | Adults    | Individual    | Psychological | Weight Control Cognitions And Behaviors | 2.07 | 2.10 | 1.40 | 2.00 |
| body dissatisfaction                          | Adults    | Individual    | Psychological | Weight Control Cognitions And Behaviors | 1.85 | 2.00 | 1.36 | 1.50 |
| cognitive restraint                           | Adults    | Individual    | Psychological | Weight Control Cognitions And Behaviors | 1.72 | 1.77 | 1.21 | 1.57 |
| disinhibition                                 | Adults    | Individual    | Psychological | Weight Control Cognitions And Behaviors | 1.65 | 1.82 | 1.18 | 1.36 |
| satiation                                     | Adults    | Individual    | Situational   | Hunger                                  | N.A. | N.A. | N.A. | N.A. |
| food deprivation                              | Adults    | Individual    | Situational   | Hunger                                  | 2.17 | 1.92 | 1.77 | 1.92 |
| hunger                                        | Adults    | Individual    | Situational   | Hunger                                  | 2.11 | 2.00 | 1.67 | 1.83 |
| physical activity level                       | Adults    | Individual    | Situational   | Related Health Behaviors                | 2.22 | 2.25 | 1.50 | 2.17 |
| frequency of television viewing               | Adults    | Individual    | Situational   | Related Health Behaviors                | 2.07 | 2.17 | 1.25 | 2.17 |
| alcohol consumption                           | Adults    | Individual    | Situational   | Related Health Behaviors                | 2.01 | 2.36 | 1.21 | 1.85 |
| smoking                                       | Adults    | Individual    | Situational   | Related Health Behaviors                | 2.00 | 2.10 | 1.40 | 1.80 |
| individual food processing (cooking)          | Adults    | Individual    | Situational   | Related Health Behaviors                | 1.86 | 2.17 | 1.17 | 1.67 |
| individual food production (growing)          | Adults    | Individual    | Situational   | Related Health Behaviors                | 1.75 | 2.00 | 1.10 | 1.60 |
| infrequent care                               | Elderly   | Individual    | Situational   | Situational And Time Constraints        | 2.22 | 2.42 | 1.33 | 2.25 |
| kitchen facilities                            | Elderly   | Individual    | Situational   | Situational And Time Constraints        | 2.06 | 2.40 | 1.27 | 1.87 |
| perceived stress                              | Adults    | Individual    | Situational   | Situational And Time Constraints        | 1.97 | 1.85 | 1.38 | 2.00 |
| workload                                      | Adults    | Individual    | Situational   | Situational And Time Constraints        | 1.92 | 1.83 | 1.33 | 1.92 |
| daily rhythm/structure                        | Adults    | Individual    | Situational   | Situational And Time Constraints        | 1.90 | 2.15 | 1.23 | 1.69 |
| work-life balance                             | Adults    | Individual    | Situational   | Situational And Time Constraints        | 1.85 | 1.92 | 1.25 | 1.75 |
| access to a car                               | Adults    | Individual    | Situational   | Situational And Time Constraints        | 1.77 | 2.15 | 1.23 | 1.31 |
| caregiving role                               | Adults    | Interpersonal | Social        | Family Structure                        | 1.94 | 1.92 | 1.31 | 1.92 |
| household size                                | Adults    | Interpersonal | Social        | Family Structure                        | 1.86 | 1.75 | 1.33 | 1.83 |
| household food processing (cooking)           | Adults    | Interpersonal | Social        | Family Food Culture                     | 2.33 | 2.36 | 1.45 | 2.45 |
| household food production (growing)           | Adults    | Interpersonal | Social        | Family Food Culture                     | 1.81 | 1.92 | 1.31 | 1.54 |
| household income                              | Adults    | Interpersonal | Social        | Household Socio-Economic Status         | 2.40 | 1.92 | 1.77 | 2.62 |
| household socio-economic status               | Adults    | Interpersonal | Social        | Household Socio-Economic Status         | 2.28 | 1.83 | 1.67 | 2.50 |
| household budget constraints                  | Adults    | Interpersonal | Social        | Household Socio-Economic Status         | 2.21 | 1.91 | 1.64 | 2.27 |
| household food security                       | Adults    | Interpersonal | Social        | Household Socio-Economic Status         | 2.08 | 1.92 | 1.50 | 2.08 |
| social relationships                          | Adults    | Interpersonal | Social        | Social Influence                        | 2.35 | 2.17 | 1.58 | 2.50 |
| social norms                                  | Adults    | Interpersonal | Social        | Social Influence                        | 2.24 | 1.92 | 1.42 | 2.67 |
| peer modeling                                 | Adults    | Interpersonal | Social        | Social Influence                        | 2.21 | 2.25 | 1.42 | 2.25 |
| eating occasion                               | Adults    | Interpersonal | Social        | Social Influence                        | 1.99 | 2.21 | 1.43 | 1.62 |
| perceived important other's dieting           | Adults    | Interpersonal | Social        | Social Influence                        | 1.98 | 2.18 | 1.36 | 1.73 |
| presence of others                            | Adults    | Interpersonal | Social        | Social Influence                        | 1.97 | 1.92 | 1.38 | 1.92 |
| social facilitation for dieting               | Adults    | Interpersonal | Social        | Social Influence                        | 1.96 | 1.92 | 1.42 | 1.83 |
| decisional power in groups                    | Adults    | Interpersonal | Social        | Social Influence                        | 1.81 | 2.00 | 1.17 | 1.67 |
| EM inter-generational influences on diet      | Adults    | Interpersonal | Social        | Social Influence                        | 1.67 | 1.89 | 1.11 | 1.44 |
| social support                                | Adults    | Interpersonal | Social        | Social Support                          | 2.31 | 2.00 | 1.50 | 2.67 |
| social ties                                   | Adults    | Interpersonal | Social        | Social Support                          | 2.13 | 2.17 | 1.42 | 2.08 |
| frequency of social contacts                  | Adults    | Interpersonal | Social        | Social Support                          | 2.06 | 2.38 | 1.17 | 2.04 |
| community recommendations                     | Adults    | Interpersonal | Social        | Social Support                          | 1.94 | 1.93 | 1.27 | 2.00 |
| salesperson recommendations                   | Adults    | Interpersonal | Social        | Social Support                          | 1.94 | 1.92 | 1.46 | 1.69 |
| social role of food                           | Adults    | Interpersonal | Cultural      | Cultural Cognitions                     | 2.15 | 2.00 | 1.50 | 2.20 |
| cultural norms                                | Adults    | Interpersonal | Cultural      | Cultural Cognitions                     | 2.08 | 1.71 | 1.50 | 2.29 |
| cultural beliefs                              | Adults    | Interpersonal | Cultural      | Cultural Cognitions                     | 2.04 | 1.73 | 1.47 | 2.20 |
| cultural values                               | Adults    | Interpersonal | Cultural      | Cultural Cognitions                     | 2.00 | 1.62 | 1.38 | 2.31 |
| EM familiarization with host-country foods    | Adults    | Interpersonal | Cultural      | Cultural Cognitions                     | 1.88 | 2.09 | 1.27 | 1.64 |
| EM status of traditional vs convenience foods | Adults    | Interpersonal | Cultural      | Cultural Cognitions                     | 1.83 | 2.13 | 1.25 | 1.50 |
| EM perception of host culture                 | Adults    | Interpersonal | Cultural      | Cultural Cognitions                     | 1.79 | 2.00 | 1.20 | 1.56 |
| EM preferences for larger body size           | Adults    | Interpersonal | Cultural      | Cultural Cognitions                     | 1.56 | 1.89 | 1.11 | 1.11 |
| cultural food habits                          | Adults    | Interpersonal | Cultural      | Cultural Behaviors                      | 2.29 | 1.82 | 1.73 | 2.45 |
| cultural traditions                           | Adults    | Interpersonal | Cultural      | Cultural Behaviors                      | 2.14 | 1.64 | 1.57 | 2.43 |
| religious rituals                             | Adults    | Interpersonal | Cultural      | Cultural Behaviors                      | 2.14 | 1.73 | 1.55 | 2.36 |
| cultural food customs                         | Adults    | Interpersonal | Cultural      | Cultural Behaviors                      | 2.04 | 1.83 | 1.25 | 2.42 |
| EM conformity to tradition                    | Adults    | Interpersonal | Cultural      | Cultural Behaviors                      | 2.01 | 1.92 | 1.42 | 2.00 |
| EM level of acculturation                     | Adults    | Interpersonal | Cultural      | Cultural Behaviors                      | 1.81 | 2.11 | 1.11 | 1.67 |
| sensory appeal                                | Adults    | Environment   | Product       | Intrinsic Product Attributes            | 2.62 | 2.38 | 1.85 | 2.69 |
| product taste                                 | Adults    | Environment   | Product       | Intrinsic Product Attributes            | 2.45 | 2.14 | 1.79 | 2.54 |
| nutritional composition                       | Adults    | Environment   | Product       | Intrinsic Product Attributes            | 2.44 | 2.33 | 1.75 | 2.36 |
| product flavor                                | Adults    | Environment   | Product       | Intrinsic Product Attributes            | 2.38 | 2.00 | 1.77 | 2.50 |
| product texture                               | Adults    | Environment   | Product       | Intrinsic Product Attributes            | 2.17 | 2.00 | 1.62 | 2.08 |
| natural content of product                    | Adults    | Environment   | Product       | Intrinsic Product Attributes            | 1.89 | 1.82 | 1.36 | 1.80 |

| Determinant                              | Age Group | Main level  | Stem-category | Leaf-category                                   | OPR  | Mod  | RS   | PLE  |
|------------------------------------------|-----------|-------------|---------------|-------------------------------------------------|------|------|------|------|
| price                                    | Adults    | Environment | Product       | Extrinsic Product Attributes                    | 2.50 | 2.31 | 1.69 | 2.67 |
| product convenience                      | Adults    | Environment | Product       | Extrinsic Product Attributes                    | 2.32 | 2.15 | 1.54 | 2.50 |
| product variety                          | Adults    | Environment | Product       | Extrinsic Product Attributes                    | 2.30 | 2.25 | 1.58 | 2.27 |
| package size                             | Adults    | Environment | Product       | Extrinsic Product Attributes                    | 2.26 | 2.33 | 1.53 | 2.14 |
| calorie labelling                        | Adults    | Environment | Product       | Extrinsic Product Attributes                    | 2.20 | 2.71 | 1.21 | 2.07 |
| nutritional information                  | Adults    | Environment | Product       | Extrinsic Product Attributes                    | 2.16 | 2.33 | 1.50 | 1.91 |
| product appearance                       | Adults    | Environment | Product       | Extrinsic Product Attributes                    | 2.15 | 2.08 | 1.46 | 2.17 |
| food labeling                            | Adults    | Environment | Product       | Extrinsic Product Attributes                    | 2.13 | 2.23 | 1.38 | 2.08 |
| product packaging                        | Adults    | Environment | Product       | Extrinsic Product Attributes                    | 2.06 | 2.31 | 1.31 | 1.92 |
| package color                            | Adults    | Environment | Product       | Extrinsic Product Attributes                    | 2.01 | 2.25 | 1.25 | 1.91 |
| product brand                            | Adults    | Environment | Product       | Extrinsic Product Attributes                    | 1.93 | 1.50 | 1.57 | 1.93 |
| portion size                             | Adults    | Environment | Micro         | Portion Size                                    | 2.55 | 2.45 | 1.82 | 2.45 |
| visual cues to portion size              | Adults    | Environment | Micro         | Portion Size                                    | 2.13 | 2.56 | 1.22 | 2.00 |
| food accessibility                       | Adults    | Environment | Micro         | Home Food Availability And Accessibility        | 2.40 | 2.08 | 1.75 | 2.50 |
| food availability                        | Adults    | Environment | Micro         | Home Food Availability And Accessibility        | 2.38 | 2.08 | 1.75 | 2.42 |
| product visibility                       | Adults    | Environment | Micro         | Home Food Availability And Accessibility        | 2.04 | 2.15 | 1.31 | 2.00 |
| enhanced eating environment              | Elderly   | Environment | Micro         | Eating Environment                              | 2.32 | 2.56 | 1.44 | 2.25 |
| meal environment                         | Adults    | Environment | Micro         | Eating Environment                              | 2.14 | 2.09 | 1.36 | 2.27 |
| season                                   | Adults    | Environment | Meso / Macro  | Natural Conditions                              | 1.96 | 1.42 | 1.54 | 2.15 |
| time of day                              | Adults    | Environment | Meso / Macro  | Natural Conditions                              | 1.74 | 1.55 | 1.33 | 1.67 |
| weather                                  | Adults    | Environment | Meso / Macro  | Natural Conditions                              | 1.55 | 1.60 | 1.18 | 1.27 |
| globalization                            | Adults    | Environment | Meso / Macro  | Characteristics Of Living Area                  | 2.05 | 2.09 | 1.18 | 2.27 |
| geographical variation                   | Adults    | Environment | Meso / Macro  | Characteristics Of Living Area                  | 2.03 | 1.73 | 1.45 | 2.18 |
| degree of urbanization                   | Adults    | Environment | Meso / Macro  | Characteristics Of Living Area                  | 1.91 | 1.60 | 1.33 | 2.13 |
| area deprivation                         | Adults    | Environment | Meso / Macro  | Characteristics Of Living Area                  | 1.77 | 2.00 | 1.00 | 1.80 |
| EM region of origin                      | Adults    | Environment | Meso / Macro  | Characteristics Of Living Area                  | 1.69 | 2.00 | 1.22 | 1.22 |
| size of municipality                     | Adults    | Environment | Meso / Macro  | Characteristics Of Living Area                  | 1.65 | 1.73 | 1.25 | 1.33 |
| neighbourhood healthy food availability  | Adults    | Environment | Meso / Macro  | Environment Food Availability And Accessibility | 2.61 | 2.45 | 1.82 | 2.64 |
| food store access                        | Adults    | Environment | Meso / Macro  | Environment Food Availability And Accessibility | 2.20 | 2.45 | 1.36 | 2.09 |
| supermarket access                       | Adults    | Environment | Meso / Macro  | Environment Food Availability And Accessibility | 2.18 | 2.17 | 1.58 | 2.00 |
| shop accessibility                       | Adults    | Environment | Meso / Macro  | Environment Food Availability And Accessibility | 2.12 | 2.00 | 1.57 | 2.00 |
| small food store availability            | Adults    | Environment | Meso / Macro  | Environment Food Availability And Accessibility | 2.04 | 2.17 | 1.42 | 1.83 |
| geographical distance to supermarket     | Adults    | Environment | Meso / Macro  | Environment Food Availability And Accessibility | 1.97 | 1.83 | 1.33 | 2.08 |
| EM accessibility to traditional foods    | Adults    | Environment | Meso / Macro  | Environment Food Availability And Accessibility | 1.92 | 2.09 | 1.18 | 1.91 |
| shop design                              | Adults    | Environment | Meso / Macro  | Environment Food Availability And Accessibility | 1.92 | 2.00 | 1.23 | 1.92 |
| spatial distance food-consumer           | Adults    | Environment | Meso / Macro  | Environment Food Availability And Accessibility | 1.86 | 1.73 | 1.18 | 2.09 |
| distance to coast                        | Adults    | Environment | Meso / Macro  | Environment Food Availability And Accessibility | 1.49 | 1.62 | 1.08 | 1.23 |
| neighbourhood supermarket density        | Adults    | Environment | Meso / Macro  | Food Outlet Density                             | 2.27 | 2.27 | 1.45 | 2.36 |
| healthy food store density               | Adults    | Environment | Meso / Macro  | Food Outlet Density                             | 2.01 | 1.83 | 1.20 | 2.40 |
| supermarket density                      | Adults    | Environment | Meso / Macro  | Food Outlet Density                             | 1.92 | 1.85 | 1.38 | 1.85 |
| fast food outlet density                 | Adults    | Environment | Meso / Macro  | Food Outlet Density                             | 1.90 | 2.00 | 1.08 | 2.08 |
| food outlet density around workplace     | Adults    | Environment | Meso / Macro  | Food Outlet Density                             | 1.81 | 2.08 | 1.15 | 1.62 |
| food outlet density                      | Adults    | Environment | Meso / Macro  | Food Outlet Density                             | 1.78 | 1.92 | 1.00 | 1.92 |
| food outlet density around home          | Adults    | Environment | Meso / Macro  | Food Outlet Density                             | 1.73 | 1.80 | 1.00 | 1.90 |
| restaurant density                       | Adults    | Environment | Meso / Macro  | Food Outlet Density                             | 1.67 | 1.83 | 1.17 | 1.42 |
| presence of food cues                    | Adults    | Environment | Meso / Macro  | Exposure To Food Promotion                      | 2.42 | 2.42 | 1.58 | 2.45 |
| food adverts                             | Adults    | Environment | Meso / Macro  | Exposure To Food Promotion                      | 2.28 | 2.33 | 1.33 | 2.50 |
| exposure to food adverts                 | Adults    | Environment | Meso / Macro  | Exposure To Food Promotion                      | 2.28 | 2.36 | 1.40 | 2.36 |
| purchase prompts at food outlet          | Adults    | Environment | Meso / Macro  | Exposure To Food Promotion                      | 2.05 | 1.91 | 1.55 | 1.91 |
| market prices                            | Adults    | Environment | Meso / Macro  | Market Prices                                   | 2.38 | 1.82 | 1.55 | 3.00 |
| cost of healthier market basket          | Adults    | Environment | Meso / Macro  | Market Prices                                   | 2.21 | 2.07 | 1.43 | 2.43 |
| food-related NGO activity                | Adults    | Environment | Meso / Macro  | Societal Initiatives                            | 1.78 | 1.92 | 1.17 | 1.67 |
| community-supported agriculture programs | Adults    | Environment | Meso / Macro  | Societal Initiatives                            | 1.75 | 2.00 | 1.07 | 1.64 |
| nutritional composition guidelines       | Adults    | Policy      | Industry      | Industry Regulations                            | 2.35 | 2.27 | 1.55 | 2.45 |
| portion size regulations                 | Adults    | Policy      | Industry      | Industry Regulations                            | 2.28 | 1.77 | 1.69 | 2.54 |
| food nutritional composition regulations | Adults    | Policy      | Industry      | Industry Regulations                            | 2.11 | 2.17 | 1.33 | 2.17 |
| lobbying                                 | Adults    | Policy      | Industry      | Industry Influence                              | 2.02 | 1.92 | 1.36 | 2.08 |
| market regulations                       | Adults    | Policy      | Government    | Governmental Regulations                        | 2.26 | 2.25 | 1.25 | 2.67 |
| food advertisement regulations           | Adults    | Policy      | Government    | Governmental Regulations                        | 2.24 | 2.27 | 1.45 | 2.27 |
| front-of-pack label regulations          | Adults    | Policy      | Government    | Governmental Regulations                        | 2.19 | 2.42 | 1.33 | 2.17 |
| taxes on unhealthy food                  | Adults    | Policy      | Government    | Governmental Regulations                        | 2.15 | 1.92 | 1.45 | 2.36 |
| subsidies for healthy foods              | Adults    | Policy      | Government    | Governmental Regulations                        | 2.13 | 2.08 | 1.58 | 1.92 |

| Determinant                            | Age Group | Main level | Stem-category | Leaf-category                 | OPR  | Mod  | RS   | PLE  |
|----------------------------------------|-----------|------------|---------------|-------------------------------|------|------|------|------|
| dietary guidelines                     | Adults    | Policy     | Government    | Governmental Regulations      | 2.11 | 2.57 | 1.21 | 1.93 |
| nutrition labeling regulations         | Adults    | Policy     | Government    | Governmental Regulations      | 2.00 | 2.08 | 1.27 | 2.00 |
| food advertisement bans                | Adults    | Policy     | Government    | Governmental Regulations      | 1.96 | 1.92 | 1.25 | 2.08 |
| food label regulations                 | Adults    | Policy     | Government    | Governmental Regulations      | 1.92 | 2.18 | 1.18 | 1.82 |
| programs discouraging unhealthy eating | Adults    | Policy     | Government    | Campaigns                     | 2.22 | 2.08 | 1.67 | 2.08 |
| programs promoting healthy eating      | Adults    | Policy     | Government    | Campaigns                     | 2.19 | 2.15 | 1.62 | 2.00 |
| educational campaigns for healthy food | Adults    | Policy     | Government    | Campaigns                     | 2.06 | 2.38 | 1.25 | 1.92 |
| sustainability awareness               | Adults    | Policy     | Government    | Broader Governmental Policies | N.A. | N.A. | N.A. | N.A. |
| health awareness                       | Adults    | Policy     | Government    | Broader Governmental Policies | 2.15 | 2.10 | 1.50 | 2.10 |
| EM immigrant-related policy            | Adults    | Policy     | Government    | Broader Governmental Policies | 1.94 | 2.18 | 1.09 | 2.00 |

| Determinant                      | Age Group   | Main level | Stem-category | Leaf-category                        | OPR  | Mod  | RS   | PLE  |
|----------------------------------|-------------|------------|---------------|--------------------------------------|------|------|------|------|
| genetic nutrient intolerances    | Children    | Individual | Biological    | Food-Related Physiology              | N.A. | N.A. | N.A. | N.A. |
| hormones                         | SA children | Individual | Biological    | Food-Related Physiology              | N.A. | N.A. | N.A. | N.A. |
| appetite                         | Children    | Individual | Biological    | Food-Related Physiology              | 2.12 | 1.44 | 1.88 | 2.11 |
| food allergies                   | Children    | Individual | Biological    | Food-Related Physiology              | 1.84 | 1.44 | 1.75 | 1.44 |
| taste sensitivity                | Children    | Individual | Biological    | Food-Related Physiology              | 1.74 | 1.14 | 1.67 | 1.57 |
| obesity-associated genes         | Children    | Individual | Biological    | Food-Related Physiology              | 1.69 | 1.00 | 1.75 | 1.44 |
| gut microbiota                   | Children    | Individual | Biological    | Food-Related Physiology              | 1.56 | 1.43 | 1.17 | 1.50 |
| BMI                              | Children    | Individual | Biological    | Anthropometrics                      | 1.81 | 1.50 | 1.29 | 2.00 |
| body composition                 | Children    | Individual | Biological    | Anthropometrics                      | 1.65 | 1.56 | 1.38 | 1.33 |
| birth weight                     | Children    | Individual | Biological    | Anthropometrics                      | 1.37 | 1.11 | 1.25 | 1.11 |
| food preferences                 | Children    | Individual | Biological    | Sensory Perception                   | 2.44 | 2.22 | 1.63 | 2.67 |
| taste aversions                  | Children    | Individual | Biological    | Sensory Perception                   | 2.14 | 1.50 | 1.86 | 2.13 |
| food liking                      | Children    | Individual | Biological    | Sensory Perception                   | 2.13 | 1.89 | 1.75 | 1.89 |
| food wanting                     | Children    | Individual | Biological    | Sensory Perception                   | 2.12 | 1.63 | 1.57 | 2.38 |
| fat liking                       | Children    | Individual | Biological    | Sensory Perception                   | 2.07 | 1.75 | 1.71 | 1.88 |
| learned taste preferences        | Children    | Individual | Biological    | Sensory Perception                   | 2.05 | 1.25 | 1.86 | 2.13 |
| biological taste preferences     | Children    | Individual | Biological    | Sensory Perception                   | 1.81 | 1.33 | 1.63 | 1.67 |
| mental health status             | Children    | Individual | Biological    | Physical Health                      | N.A. | N.A. | N.A. | N.A. |
| health status                    | Children    | Individual | Biological    | Physical Health                      | 1.92 | 1.56 | 1.63 | 1.78 |
| chronic diseases                 | Children    | Individual | Biological    | Physical Health                      | 1.84 | 1.11 | 1.75 | 1.78 |
| prematurity                      | Children    | Individual | Biological    | Physical Health                      | 1.37 | 1.00 | 1.25 | 1.22 |
| sleep duration                   | Children    | Individual | Biological    | Sleep Characteristics                | 1.57 | 1.89 | 1.00 | 1.33 |
| sleep difficulties               | Children    | Individual | Biological    | Sleep Characteristics                | 1.53 | 1.78 | 1.13 | 1.11 |
| having been breastfed            | Children    | Individual | Demographic   | Biological Demographics              | 1.88 | 1.25 | 1.43 | 2.25 |
| sex                              | Children    | Individual | Demographic   | Biological Demographics              | 1.61 | 1.00 | 1.38 | 1.78 |
| age                              | Children    | Individual | Demographic   | Biological Demographics              | 1.59 | 1.00 | 1.25 | 1.89 |
| cultural identity                | SA children | Individual | Demographic   | Cultural Characteristics             | 1.90 | 1.14 | 1.43 | 2.43 |
| religion                         | Children    | Individual | Demographic   | Cultural Characteristics             | 1.71 | 1.00 | 1.43 | 2.00 |
| nationality                      | Children    | Individual | Demographic   | Cultural Characteristics             | 1.67 | 1.00 | 1.43 | 1.88 |
| ethnicity                        | Children    | Individual | Demographic   | Cultural Characteristics             | 1.63 | 1.00 | 1.43 | 1.75 |
| EM competency in host language   | Children    | Individual | Demographic   | Situational Demographics             | 1.69 | 2.00 | 1.17 | 1.33 |
| place of residence               | Children    | Individual | Demographic   | Situational Demographics             | 1.58 | 1.11 | 1.38 | 1.56 |
| socio-economic status            | Children    | Individual | Demographic   | Personal Socio-Economic Status       | 1.82 | 1.00 | 1.50 | 2.22 |
| self-efficacy                    | Children    | Individual | Psychological | Personality                          | 2.12 | 2.00 | 1.50 | 2.11 |
| distractibility when eating      | Children    | Individual | Psychological | Personality                          | 1.96 | 2.00 | 1.50 | 1.63 |
| self-esteem                      | SA children | Individual | Psychological | Personality                          | 1.60 | 1.33 | 1.13 | 1.78 |
| personality / temperament        | Children    | Individual | Psychological | Personality                          | 1.59 | 1.25 | 1.43 | 1.38 |
| wellbeing                        | Children    | Individual | Psychological | Mood And Emotions                    | N.A. | N.A. | N.A. | N.A. |
| positive emotions                | Children    | Individual | Psychological | Mood And Emotions                    | 1.89 | 1.88 | 1.29 | 1.88 |
| negative emotions                | Children    | Individual | Psychological | Mood And Emotions                    | 1.76 | 1.63 | 1.43 | 1.50 |
| mood                             | Children    | Individual | Psychological | Mood And Emotions                    | 1.70 | 1.63 | 1.14 | 1.75 |
| depressive symptomatology        | SA children | Individual | Psychological | Mood And Emotions                    | 1.62 | 1.43 | 1.43 | 1.29 |
| self-regulation skills           | Children    | Individual | Psychological | Self-Regulation                      | 2.24 | 1.78 | 1.88 | 2.13 |
| self-control                     | Children    | Individual | Psychological | Self-Regulation                      | 1.98 | 1.89 | 1.38 | 2.00 |
| emotion suppression              | Children    | Individual | Psychological | Self-Regulation                      | 1.79 | 1.86 | 1.29 | 1.57 |
| impulsivity                      | Children    | Individual | Psychological | Self-Regulation                      | 1.75 | 1.43 | 1.50 | 1.57 |
| future time orientation          | SA children | Individual | Psychological | Self-Regulation                      | 1.72 | 1.67 | 1.00 | 2.00 |
| executive functioning            | Children    | Individual | Psychological | Self-Regulation                      | 1.53 | 1.17 | 1.17 | 1.67 |
| previous experience with disease | Children    | Individual | Psychological | Health Cognitions                    | N.A. | N.A. | N.A. | N.A. |
| nutrition knowledge              | SA children | Individual | Psychological | Food Knowledge, Skills and Abilities | 2.13 | 2.56 | 1.38 | 1.78 |
| food familiarity                 | Children    | Individual | Psychological | Food Knowledge, Skills and Abilities | 2.03 | 2.11 | 1.25 | 2.11 |
| food memories                    | Children    | Individual | Psychological | Food Knowledge, Skills and Abilities | 1.60 | 1.25 | 1.29 | 1.63 |
| food involvement                 | Children    | Individual | Psychological | Food Beliefs                         | 2.23 | 2.38 | 1.71 | 1.75 |
| food concerns                    | SA children | Individual | Psychological | Food Beliefs                         | 2.16 | 2.00 | 1.57 | 2.13 |
| food enjoyment                   | Children    | Individual | Psychological | Food Beliefs                         | 2.02 | 2.11 | 1.38 | 1.89 |
| trust in the food industry       | SA children | Individual | Psychological | Food Beliefs                         | 1.93 | 1.88 | 1.29 | 2.00 |
| food risk aversion               | SA children | Individual | Psychological | Food Beliefs                         | 1.81 | 1.88 | 1.29 | 1.63 |
| habitual eating                  | Children    | Individual | Psychological | Food Habits                          | 2.03 | 1.89 | 1.63 | 1.78 |
| past eating behavior             | Children    | Individual | Psychological | Food Habits                          | 1.80 | 1.27 | 1.60 | 1.73 |
| mindful eating                   | SA children | Individual | Psychological | Eating Regulation                    | 2.01 | 2.25 | 1.43 | 1.63 |
| external eating                  | Children    | Individual | Psychological | Eating Regulation                    | 1.87 | 1.75 | 1.57 | 1.50 |
| neophobia                        | Children    | Individual | Psychological | Eating Regulation                    | 1.86 | 1.50 | 1.71 | 1.50 |



| Determinant                           | Age Group   | Main level    | Stem-category | Leaf-category                           | OPR  | Mod  | RS   | PLE  |
|---------------------------------------|-------------|---------------|---------------|-----------------------------------------|------|------|------|------|
| food selectivity                      | Children    | Individual    | Psychological | Eating Regulation                       | 1.77 | 1.86 | 1.17 | 1.71 |
| emotional eating                      | Children    | Individual    | Psychological | Eating Regulation                       | 1.77 | 1.25 | 1.71 | 1.50 |
| variety seeking                       | Children    | Individual    | Psychological | Eating Regulation                       | 1.71 | 1.86 | 1.14 | 1.57 |
| intuitive eating                      | Children    | Individual    | Psychological | Eating Regulation                       | 1.70 | 1.63 | 1.14 | 1.75 |
| body weight perception                | SA children | Individual    | Psychological | Weight Control Cognitions And Behaviors | N.A. | N.A. | N.A. | N.A. |
| eating in the absence of hunger       | Children    | Individual    | Psychological | Weight Control Cognitions And Behaviors | 2.24 | 2.00 | 2.00 | 1.71 |
| weight control goal                   | SA children | Individual    | Psychological | Weight Control Cognitions And Behaviors | 1.95 | 1.78 | 1.38 | 2.00 |
| body dissatisfaction                  | SA children | Individual    | Psychological | Weight Control Cognitions And Behaviors | 1.83 | 1.50 | 1.75 | 1.38 |
| weight control concerns               | SA children | Individual    | Psychological | Weight Control Cognitions And Behaviors | 1.77 | 1.75 | 1.29 | 1.63 |
| cognitive restraint                   | SA children | Individual    | Psychological | Weight Control Cognitions And Behaviors | 1.74 | 1.57 | 1.29 | 1.71 |
| disinhibition                         | Children    | Individual    | Psychological | Weight Control Cognitions And Behaviors | 1.71 | 1.71 | 1.33 | 1.43 |
| satiation                             | Children    | Individual    | Situational   | Hunger                                  | N.A. | N.A. | N.A. | N.A. |
| food deprivation                      | Children    | Individual    | Situational   | Hunger                                  | 2.22 | 1.88 | 1.86 | 2.00 |
| hunger                                | Children    | Individual    | Situational   | Hunger                                  | 2.21 | 1.38 | 2.00 | 2.25 |
| frequency of television viewing       | Children    | Individual    | Situational   | Related Health Behaviors                | 2.34 | 2.22 | 1.50 | 2.56 |
| physical activity level               | Children    | Individual    | Situational   | Related Health Behaviors                | 2.22 | 2.33 | 1.63 | 1.89 |
| perceived stress                      | SA children | Individual    | Situational   | Situational And Time Constraints        | 2.24 | 2.25 | 1.57 | 2.13 |
| daily rhythm/structure                | Children    | Individual    | Situational   | Situational And Time Constraints        | 1.86 | 2.00 | 1.14 | 1.88 |
| parental access to a car              | Children    | Individual    | Situational   | Situational And Time Constraints        | 1.42 | 1.38 | 1.00 | 1.38 |
| household size                        | Children    | Interpersonal | Social        | Family Structure                        | 1.56 | 1.00 | 1.29 | 1.75 |
| family cohesion                       | Children    | Interpersonal | Social        | Family Structure                        | 1.49 | 1.22 | 1.13 | 1.56 |
| family composition                    | Children    | Interpersonal | Social        | Family Structure                        | 1.23 | 1.00 | 1.13 | 1.00 |
| family food culture                   | Children    | Interpersonal | Social        | Family Food Culture                     | 2.07 | 1.67 | 1.63 | 2.11 |
| household food processing (cooking)   | Children    | Interpersonal | Social        | Family Food Culture                     | 2.05 | 2.11 | 1.50 | 1.78 |
| family preferences                    | Children    | Interpersonal | Social        | Family Food Culture                     | 2.01 | 1.78 | 1.50 | 2.00 |
| household food production (growing)   | Children    | Interpersonal | Social        | Family Food Culture                     | 1.42 | 1.50 | 1.00 | 1.25 |
| parental food insecurity              | Children    | Interpersonal | Social        | Household Socio-Economic Status         | 1.93 | 2.25 | 1.29 | 1.63 |
| household food security               | Children    | Interpersonal | Social        | Household Socio-Economic Status         | 1.91 | 1.50 | 1.57 | 1.88 |
| low parental income                   | Children    | Interpersonal | Social        | Household Socio-Economic Status         | 1.79 | 1.00 | 1.50 | 2.11 |
| parental educational level            | Children    | Interpersonal | Social        | Household Socio-Economic Status         | 1.72 | 1.11 | 1.38 | 2.00 |
| household income                      | Children    | Interpersonal | Social        | Household Socio-Economic Status         | 1.72 | 1.00 | 1.38 | 2.11 |
| household socio-economic status       | Children    | Interpersonal | Social        | Household Socio-Economic Status         | 1.70 | 1.00 | 1.25 | 2.22 |
| household budget constraints          | Children    | Interpersonal | Social        | Household Socio-Economic Status         | 1.67 | 1.25 | 1.43 | 1.63 |
| parental income                       | Children    | Interpersonal | Social        | Household Socio-Economic Status         | 1.65 | 1.00 | 1.38 | 1.89 |
| parental occupation                   | Children    | Interpersonal | Social        | Household Socio-Economic Status         | 1.45 | 1.00 | 1.13 | 1.67 |
| peer modeling                         | Children    | Interpersonal | Social        | Social Influence                        | 2.28 | 2.00 | 1.75 | 2.22 |
| eating occasion                       | Children    | Interpersonal | Social        | Social Influence                        | 2.21 | 2.13 | 1.43 | 2.38 |
| social norms                          | Children    | Interpersonal | Social        | Social Influence                        | 2.05 | 1.33 | 1.50 | 2.56 |
| decisional power in groups            | SA children | Interpersonal | Social        | Social Influence                        | 1.85 | 1.78 | 1.25 | 1.89 |
| parental recommendations              | Children    | Interpersonal | Social        | Social Support                          | 2.37 | 2.38 | 1.57 | 2.38 |
| social support                        | Children    | Interpersonal | Social        | Social Support                          | 2.06 | 2.00 | 1.38 | 2.11 |
| community recommendations             | Children    | Interpersonal | Social        | Social Support                          | 1.93 | 1.88 | 1.29 | 2.00 |
| peer cooking practices and skills     | SA children | Interpersonal | Social        | Social Support                          | 1.86 | 2.25 | 1.14 | 1.63 |
| salesperson recommendations           | SA children | Interpersonal | Social        | Social Support                          | 1.74 | 2.00 | 1.14 | 1.50 |
| bonding with parents                  | Infants     | Interpersonal | Social        | Social Support                          | 1.70 | 1.50 | 1.14 | 1.88 |
| parental nutrition knowledge          | Children    | Interpersonal | Social        | Parental Resources And Risk Factors     | 2.37 | 2.56 | 1.63 | 2.11 |
| parental food market knowledge        | Children    | Interpersonal | Social        | Parental Resources And Risk Factors     | 2.24 | 2.56 | 1.38 | 2.11 |
| parental food product knowledge       | Children    | Interpersonal | Social        | Parental Resources And Risk Factors     | 2.19 | 2.33 | 1.50 | 2.00 |
| parental time constraints             | Children    | Interpersonal | Social        | Parental Resources And Risk Factors     | 1.85 | 1.56 | 1.25 | 2.11 |
| parental depression                   | Children    | Interpersonal | Social        | Parental Resources And Risk Factors     | 1.29 | 1.25 | 1.00 | 1.13 |
| parental weight control concerns      | Children    | Interpersonal | Social        | Parental Attitudes And Beliefs          | 2.12 | 2.00 | 1.57 | 2.00 |
| parental perception of child's weight | Children    | Interpersonal | Social        | Parental Attitudes And Beliefs          | 2.06 | 2.44 | 1.38 | 1.67 |
| parental perceived food safety        | Children    | Interpersonal | Social        | Parental Attitudes And Beliefs          | 2.02 | 2.33 | 1.38 | 1.67 |
| parental weight control goal          | Children    | Interpersonal | Social        | Parental Attitudes And Beliefs          | 1.96 | 2.00 | 1.43 | 1.75 |
| parental lay food theories            | Children    | Interpersonal | Social        | Parental Attitudes And Beliefs          | 1.94 | 1.71 | 1.50 | 1.86 |
| parental trust in food labeling       | Children    | Interpersonal | Social        | Parental Attitudes And Beliefs          | 1.78 | 2.00 | 1.14 | 1.63 |
| parental trust in food producers      | Children    | Interpersonal | Social        | Parental Attitudes And Beliefs          | 1.78 | 2.00 | 1.14 | 1.63 |
| parental food ethics                  | Children    | Interpersonal | Social        | Parental Attitudes And Beliefs          | 1.71 | 1.25 | 1.43 | 1.75 |
| parental food risk aversion           | Children    | Interpersonal | Social        | Parental Attitudes And Beliefs          | 1.70 | 1.88 | 1.14 | 1.50 |
| parental willingness-to-pay           | Children    | Interpersonal | Social        | Parental Attitudes And Beliefs          | 1.70 | 1.63 | 1.17 | 1.71 |
| parental trust in food certification  | Children    | Interpersonal | Social        | Parental Attitudes And Beliefs          | 1.61 | 1.75 | 1.14 | 1.38 |
| parental trust in food distribution   | Children    | Interpersonal | Social        | Parental Attitudes And Beliefs          | 1.55 | 1.86 | 1.00 | 1.29 |



| Determinant                              | Age Group   | Main level    | Stem-category | Leaf-category                                   | OPR  | Mod  | RS   | PLE  |
|------------------------------------------|-------------|---------------|---------------|-------------------------------------------------|------|------|------|------|
| parental body dissatisfaction            | Children    | Interpersonal | Social        | Parental Attitudes And Beliefs                  | 1.49 | 1.50 | 1.14 | 1.25 |
| parental modeling                        | Children    | Interpersonal | Social        | Parental Behaviors                              | 2.40 | 2.25 | 1.71 | 2.38 |
| parental food habits                     | Children    | Interpersonal | Social        | Parental Behaviors                              | 2.33 | 2.11 | 1.63 | 2.44 |
| parental food processing (cooking)       | Children    | Interpersonal | Social        | Parental Behaviors                              | 2.28 | 2.22 | 1.75 | 2.00 |
| EM parental conformity to tradition      | Children    | Interpersonal | Social        | Parental Behaviors                              | 2.00 | 1.33 | 1.67 | 2.17 |
| parental lifestyle                       | Children    | Interpersonal | Social        | Parental Behaviors                              | 2.00 | 1.67 | 1.63 | 1.89 |
| parental smart shopping                  | Children    | Interpersonal | Social        | Parental Behaviors                              | 1.92 | 2.00 | 1.25 | 1.89 |
| parental frugality                       | Children    | Interpersonal | Social        | Parental Behaviors                              | 1.64 | 1.29 | 1.50 | 1.38 |
| parental food production (growing)       | Children    | Interpersonal | Social        | Parental Behaviors                              | 1.51 | 1.44 | 1.25 | 1.22 |
| early exposure                           | Children    | Interpersonal | Social        | Parental Feeding Styles                         | N.A. | N.A. | N.A. | N.A. |
| parental portion size habits             | Children    | Interpersonal | Social        | Parental Feeding Styles                         | 2.27 | 2.22 | 1.50 | 2.33 |
| food used as incentive                   | Children    | Interpersonal | Social        | Parental Feeding Styles                         | 2.24 | 2.38 | 1.57 | 2.00 |
| parental food restriction                | Children    | Interpersonal | Social        | Parental Feeding Styles                         | 2.18 | 2.22 | 1.63 | 1.89 |
| parental pressure-to-eat                 | Children    | Interpersonal | Social        | Parental Feeding Styles                         | 2.15 | 2.22 | 1.63 | 1.78 |
| parental instrumental feeding            | Children    | Interpersonal | Social        | Parental Feeding Styles                         | 2.11 | 1.88 | 1.71 | 1.88 |
| parental complementary feeding practices | Infants     | Interpersonal | Social        | Parental Feeding Styles                         | 2.04 | 2.00 | 1.57 | 1.75 |
| parental emotional feeding               | Children    | Interpersonal | Social        | Parental Feeding Styles                         | 1.95 | 1.63 | 1.57 | 1.88 |
| cultural beliefs                         | Children    | Interpersonal | Cultural      | Cultural Cognitions                             | 2.14 | 1.14 | 1.71 | 2.71 |
| cultural values                          | Children    | Interpersonal | Cultural      | Cultural Cognitions                             | 2.10 | 1.14 | 1.71 | 2.57 |
| cultural norms                           | Children    | Interpersonal | Cultural      | Cultural Cognitions                             | 1.93 | 1.14 | 1.57 | 2.29 |
| social role of food                      | SA children | Interpersonal | Cultural      | Cultural Cognitions                             | 1.90 | 1.43 | 1.43 | 2.14 |
| cultural food customs                    | Children    | Interpersonal | Cultural      | Cultural Behaviors                              | 2.08 | 1.33 | 1.50 | 2.67 |
| cultural traditions                      | Children    | Interpersonal | Cultural      | Cultural Behaviors                              | 1.98 | 1.14 | 1.57 | 2.43 |
| religious rituals                        | Children    | Interpersonal | Cultural      | Cultural Behaviors                              | 1.71 | 1.00 | 1.43 | 2.00 |
| EM level of acculturation                | SA children | Interpersonal | Cultural      | Cultural Behaviors                              | 1.56 | 1.33 | 1.00 | 1.83 |
| nutritional composition                  | SA children | Environment   | Product       | Intrinsic Product Attributes                    | 2.26 | 2.14 | 1.67 | 2.14 |
| product taste                            | Children    | Environment   | Product       | Intrinsic Product Attributes                    | 2.24 | 2.25 | 1.57 | 2.13 |
| product texture                          | Children    | Environment   | Product       | Intrinsic Product Attributes                    | 2.16 | 2.00 | 1.57 | 2.13 |
| product sensory properties               | Children    | Environment   | Product       | Intrinsic Product Attributes                    | 2.10 | 2.14 | 1.33 | 2.14 |
| product flavor                           | Children    | Environment   | Product       | Intrinsic Product Attributes                    | 2.02 | 2.13 | 1.29 | 2.00 |
| product package size                     | Children    | Environment   | Product       | Extrinsic Product Attributes                    | 2.49 | 2.63 | 1.57 | 2.50 |
| package size                             | Children    | Environment   | Product       | Extrinsic Product Attributes                    | 2.42 | 2.63 | 1.43 | 2.50 |
| price                                    | SA children | Environment   | Product       | Extrinsic Product Attributes                    | 2.40 | 2.00 | 1.71 | 2.63 |
| nutritional information                  | SA children | Environment   | Product       | Extrinsic Product Attributes                    | 2.23 | 2.56 | 1.50 | 1.89 |
| product appearance                       | Children    | Environment   | Product       | Extrinsic Product Attributes                    | 2.23 | 2.38 | 1.29 | 2.38 |
| package color                            | Children    | Environment   | Product       | Extrinsic Product Attributes                    | 2.20 | 2.88 | 1.14 | 2.00 |
| product variety                          | Children    | Environment   | Product       | Extrinsic Product Attributes                    | 2.17 | 2.25 | 1.43 | 2.13 |
| product packaging                        | Children    | Environment   | Product       | Extrinsic Product Attributes                    | 2.11 | 2.38 | 1.14 | 2.25 |
| product convenience                      | SA children | Environment   | Product       | Extrinsic Product Attributes                    | 2.02 | 2.00 | 1.38 | 2.00 |
| food labeling                            | Children    | Environment   | Product       | Extrinsic Product Attributes                    | 2.01 | 2.33 | 1.13 | 2.00 |
| product brand                            | SA children | Environment   | Product       | Extrinsic Product Attributes                    | 1.89 | 2.00 | 1.29 | 1.75 |
| portion size                             | Children    | Environment   | Micro         | Portion Size                                    | 2.41 | 2.22 | 1.63 | 2.56 |
| food accessibility                       | Children    | Environment   | Micro         | Home Food Availability And Accessibility        | 2.64 | 2.44 | 1.88 | 2.67 |
| food availability                        | Children    | Environment   | Micro         | Home Food Availability And Accessibility        | 2.64 | 2.33 | 1.88 | 2.78 |
| product visibility                       | SA children | Environment   | Micro         | Home Food Availability And Accessibility        | 2.07 | 2.22 | 1.25 | 2.11 |
| meal environment                         | Children    | Environment   | Micro         | Eating Environment                              | 2.21 | 2.44 | 1.38 | 2.11 |
| time of day                              | Children    | Environment   | Meso / Macro  | Natural Conditions                              | 1.67 | 1.25 | 1.43 | 1.63 |
| season                                   | Children    | Environment   | Meso / Macro  | Natural Conditions                              | 1.54 | 1.00 | 1.38 | 1.56 |
| weather                                  | Children    | Environment   | Meso / Macro  | Natural Conditions                              | 1.28 | 1.00 | 1.00 | 1.33 |
| area deprivation                         | Children    | Environment   | Meso / Macro  | Characteristics Of Living Area                  | 1.64 | 1.29 | 1.29 | 1.71 |
| EM region of origin                      | Children    | Environment   | Meso / Macro  | Characteristics Of Living Area                  | 1.61 | 1.00 | 1.33 | 1.83 |
| degree of urbanization                   | Children    | Environment   | Meso / Macro  | Characteristics Of Living Area                  | 1.49 | 1.00 | 1.14 | 1.75 |
| school canteen food environment          | SA children | Environment   | Meso / Macro  | Environment Food Availability And Accessibility | 2.24 | 2.14 | 1.33 | 2.57 |
| shop accessibility                       | SA children | Environment   | Meso / Macro  | Environment Food Availability And Accessibility | 2.06 | 1.56 | 1.38 | 2.56 |
| shop design                              | SA children | Environment   | Meso / Macro  | Environment Food Availability And Accessibility | 1.90 | 2.00 | 1.13 | 2.00 |
| fast food outlet density                 | SA children | Environment   | Meso / Macro  | Food Outlet Density                             | 1.91 | 1.33 | 1.38 | 2.33 |
| supermarket density                      | SA children | Environment   | Meso / Macro  | Food Outlet Density                             | 1.78 | 1.44 | 1.13 | 2.22 |
| exposure to food adverts                 | SA children | Environment   | Meso / Macro  | Exposure To Food Promotion                      | 2.27 | 2.00 | 1.50 | 2.56 |
| purchase prompts at food outlet          | SA children | Environment   | Meso / Macro  | Exposure To Food Promotion                      | 2.08 | 1.89 | 1.50 | 2.11 |
| market prices                            | SA children | Environment   | Meso / Macro  | Market Prices                                   | 2.12 | 1.56 | 1.50 | 2.56 |
| food-related NGO activity                | Children    | Environment   | Meso / Macro  | Societal Initiatives                            | 1.67 | 1.75 | 1.00 | 1.75 |
| portion size regulations                 | Children    | Policy        | Industry      | Industry Regulations                            | 2.36 | 1.88 | 1.71 | 2.63 |

| Determinant                              | Age Group   | Main level | Stem-category | Leaf-category            | OPR  | Mod  | RS   | PLE  |
|------------------------------------------|-------------|------------|---------------|--------------------------|------|------|------|------|
| food nutritional composition regulations | Children    | Policy     | Industry      | Industry Regulations     | 2.18 | 2.13 | 1.29 | 2.50 |
| nutritional composition guidelines       | Children    | Policy     | Industry      | Industry Regulations     | 1.99 | 2.38 | 1.14 | 1.88 |
| lobbying                                 | Children    | Policy     | Industry      | Industry Influence       | 2.04 | 1.86 | 1.17 | 2.50 |
| dietary guidelines                       | SA children | Policy     | Government    | Governmental Regulations | 2.23 | 2.22 | 1.50 | 2.22 |
| food advertisement regulations           | Children    | Policy     | Government    | Governmental Regulations | 2.17 | 2.00 | 1.38 | 2.44 |
| subsidies for healthy foods              | Children    | Policy     | Government    | Governmental Regulations | 2.17 | 2.11 | 1.38 | 2.33 |
| nutrition labeling regulations           | Children    | Policy     | Government    | Governmental Regulations | 2.01 | 2.11 | 1.13 | 2.22 |
| market regulations                       | Children    | Policy     | Government    | Governmental Regulations | 1.99 | 1.63 | 1.14 | 2.63 |
| food label regulations                   | Children    | Policy     | Government    | Governmental Regulations | 1.95 | 2.13 | 1.14 | 2.00 |
| food advertisement bans                  | Children    | Policy     | Government    | Governmental Regulations | 1.88 | 1.56 | 1.25 | 2.22 |
| programs promoting healthy eating        | Children    | Policy     | Government    | Campaigns                | 2.28 | 2.78 | 1.38 | 2.00 |
| programs discouraging unhealthy eating   | Children    | Policy     | Government    | Campaigns                | 2.14 | 2.56 | 1.25 | 2.00 |
| educational campaigns for healthy food   | Children    | Policy     | Government    | Campaigns                | 2.11 | 2.33 | 1.25 | 2.11 |
